# Supplementary material
Source: PubMed Central journal article supplement (PMC8881089)
Supplement: NIHMS1780032-supplement-Supplementary_Tables.pdf [file NIHMS1780032-supplement-Supplementary_Tables.pdf]

**Supplementary Table 1. Search Strategy**

PubMed: November 14, 2019

1. “cannabis use disorder”/4158
2. “pharmacotherapy”/3135179
3. 1 and 2/1028
4. Limit 3 to (Clinical Trial, Human population, and English Language)/100

MEDLINE: November 14, 2019

1. Exp cannabis dependence.mp. or exp Marijuana Abuse/6268
2. Exp pharmacotherapy.mp. or exp Drug Therapy/1346508
3. 1 and 2/298
4. Limit 3 to (English Language and Humans)/253

EMBASE: November 14, 2019

1. Exp cannabis addiction/9646
2. Exp pharmacotherapy.mp. or exp drug therapy/2796749
3. 1 and 2/1009
4. Limit 3 to (English Language and Humans)/929

PsycINFO: November 14, 2019

1. Exp Marijuana Usage or marijuana abuse.mp or cannabis dependence.mp or exp “Cannabis Use Disorder”/ or “cannabis use disorder”/6569
2. Exp pharmacotherapy.mp. or exp drug therapy/146907
3. 1 and 2/466
4. Limit 3 to (English Language and Humans)/432

Cochrane Central Register of Controlled Trials: November 14, 2019

1. Exp cannabis dependence.mp. or Marijuana Abuse/653
2. Exp pharmacotherapy.mp. or exp drug therapy/7331
3. 1 and 2/30

**Supplementary Table 2. Secondary outcomes**

| <b>Study</b>            | <b>Abstinence</b> | <b>Adverse events</b> | <b>Withdrawal Severity</b>      | <b>Cravings Severity</b>        | <b>CUD Severity</b>         |
|-------------------------|-------------------|-----------------------|---------------------------------|---------------------------------|-----------------------------|
| <i>Allsop 2014</i>      | Not reported      | 13/27 vs. 12/24       | 1.88 (1.64) vs. 2.22 (1.62)     | 1.87 (2.28) vs. 1.81 (2.26)     | 4.11 (5.29) vs. 4.04 (5.21) |
| <i>Carpenter 2009</i>   | 8/36 vs. 4/30     | 15/36 vs. 8/30        | 3.1 (1.9) vs. 1.9 (1.9)         | Not reported                    | 2.5 (1.4) vs. 2.3 (1.6)     |
| <i>Carpenter 2009b</i>  | 4/40 vs. 4/30     | 18/40 vs. 8/30        | 4.0 (2.1) vs. 1.9 (1.9)         | Not reported                    | 2.7 (1.5) vs. 2.3 (1.6)     |
| <i>Cornelius 1999</i>   | Not reported      | 0/11 vs. 0/11         | Not reported                    | Not reported                    | 40.2 (8.5) vs. 47.5 (8.5)   |
| <i>Cornelius 2010</i>   | 7/34 vs. 8/36     | 0/34 vs. 0/36         | Not reported                    | Not reported                    | 3.88 (2.51) vs. 3.61 (1.92) |
| <i>D'Souza 2019</i>     | Not reported      | 20/46 vs. 11/24       | 7.65 (1.32) vs. 9.04 (2.08)     | Not reported                    | Not reported                |
| <i>Gray 2012</i>        | 11/58 vs. 6/58    | 24/58 vs. 27/58       | Not reported                    | Not reported                    | Not reported                |
| <i>Gray 2017</i>        | 33/153 vs. 36/149 | 41/153 vs. 41/149     | Not reported                    | Not reported                    | Not reported                |
| <i>Hill 2017</i>        | 1/10 vs. 1/8      | 2/10 vs. 4/8          | Not reported                    | 51.7 (14) vs. 52.3 (10.4)       | Not reported                |
| <i>Johnston 2014</i>    | 6/16 vs. 6/22     | 12/16 vs. 14/22       | 1.24 (1.66) vs. 1.25 (1.97)     | Not reported                    | 3.07 (4.04) vs. 3.85 (3.91) |
| <i>Levin 2004</i>       | 6/13 vs. 5/12     | 3/13 vs. 1/12         | 19.22 (10.15) vs. 12.83 (10.22) | 27.56 (36.71) vs. 16.83 (28.94) | Not reported                |
| <i>Levin 2011</i>       | 14/79 vs. 12/77   | 53/79 vs. 45/77       | 4 (4.7) vs. 5 (5.4)             | Not reported                    | Not reported                |
| <i>Levin 2013</i>       | 6/51 vs. 19/52    | 51/51 vs. 29/52       | Not reported                    | Not reported                    | Not reported                |
| <i>Levin 2016</i>       | 17/61 vs. 19/61   | 47/61 vs. 46/61       | 4.8 (0.61) vs. 5.5 (0.77)       | 42.4 (16.9) vs. 40.1 (15.4)     | Not reported                |
| <i>Lintzeris 2019</i>   | 18/61 vs. 11/67   | 15/61 vs. 17/67       | 30.7 (28.9) vs. 43.6 (37.3)     | 27.2 (18.9) 31.2 (15.2)         | Not reported                |
| <i>Mason 2012</i>       | Not reported      | 15/25 vs. 20/25       | 1.5 (1.0) vs. 0.4 (1.0)         | 0.2 (0.1) vs. 0.75 (0.3)        | 1.4 (1.6) vs. 1.6 (0.7)     |
| <i>McRae-Clark 2009</i> | 5/23 vs. 2/27     | 22/23 vs. 21/27       | 7.73 (8.99) vs. 7.00 (7.73)     | 19.95 (16.29) vs. 26.9 (15.75)  | Not reported                |
| <i>McRae-Clark 2010</i> | 8/19 vs. 6/19     | 19/19 vs. 16/19       | Not reported                    | 25.51 (13.28) vs. 25.55 (15.97) | Not reported                |
| <i>McRae-Clark 2015</i> | 8/88 vs. 4/87     | 73/88 vs. 66/87       | Not reported                    | 46.4 (1.79) vs. 45.8 (1.48)     | Not reported                |
| <i>McRae-Clark 2016</i> | 2/41 vs. 2/35     | 25/41 vs. 28/35       | Not reported                    | 49.9 (2.55) vs. 46.7 (0.11)     | Not reported                |
| <i>Miranda 2017</i>     | Not reported      | 14/40 vs. 1/26        | Not reported                    | Not reported                    | Not reported                |
| <i>Penetar 2012</i>     | Not reported      | 0/10 vs. 0/12         | 3.0 (0.51) vs. 4.1 (0.97)       | 1.2 (0.31) vs. 1.5 (0.26)       | Not reported                |
| <i>Sherman 2017</i>     | 0/8 vs. 0/8       | 1/8 vs. 2/8           | Not reported                    | Not reported                    | Not reported                |
| <i>Trigo 2018</i>       | 5/20 vs. 7/20     | 16/20 vs. 16/20       | 4.5 (0.6) vs. 4 (1)             | 7.0 (2.0) vs. 9.0 (2.0)         | Not reported                |
| <i>Weinstein 2014</i>   | 7/26 vs. 3/26     | 2/26 vs. 1/26         | Not reported                    | Not reported                    | Not reported                |

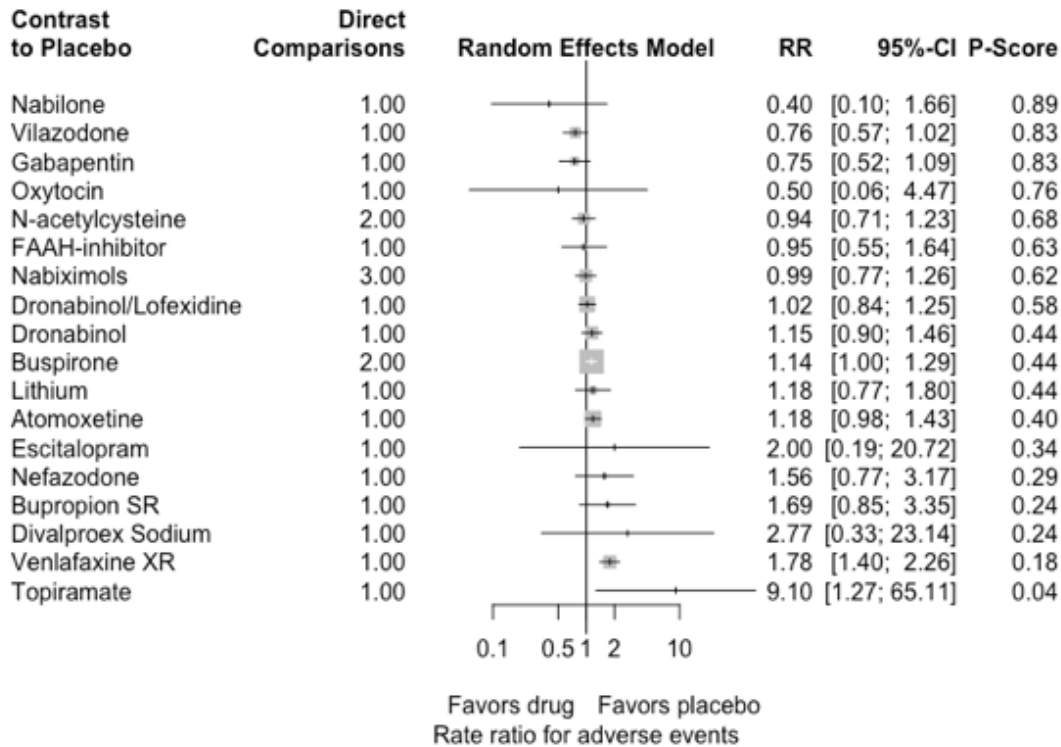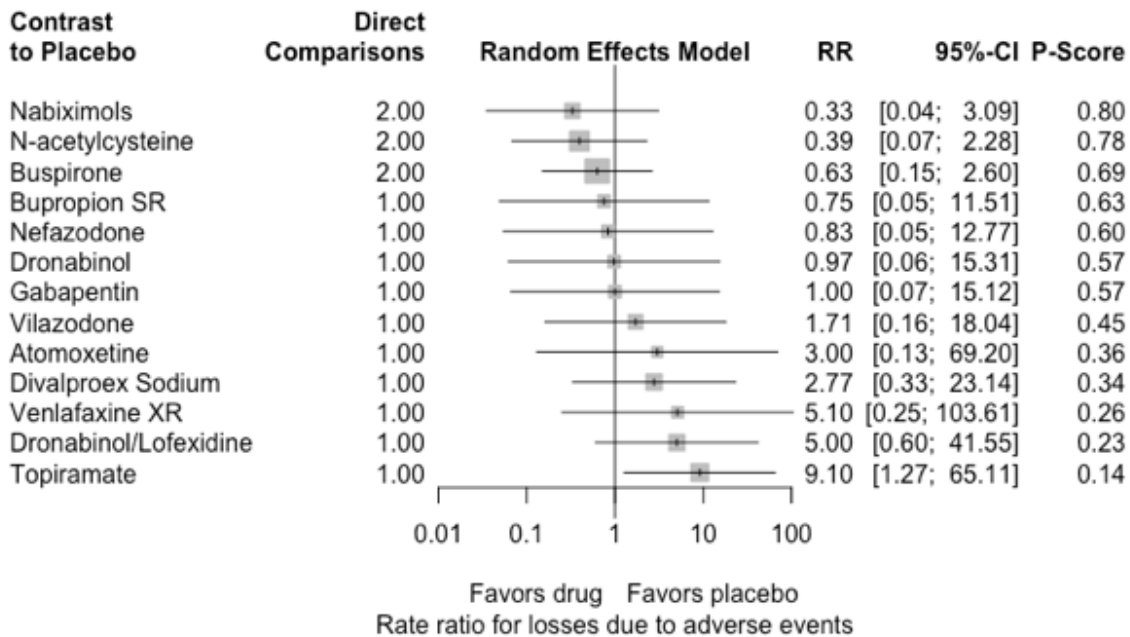

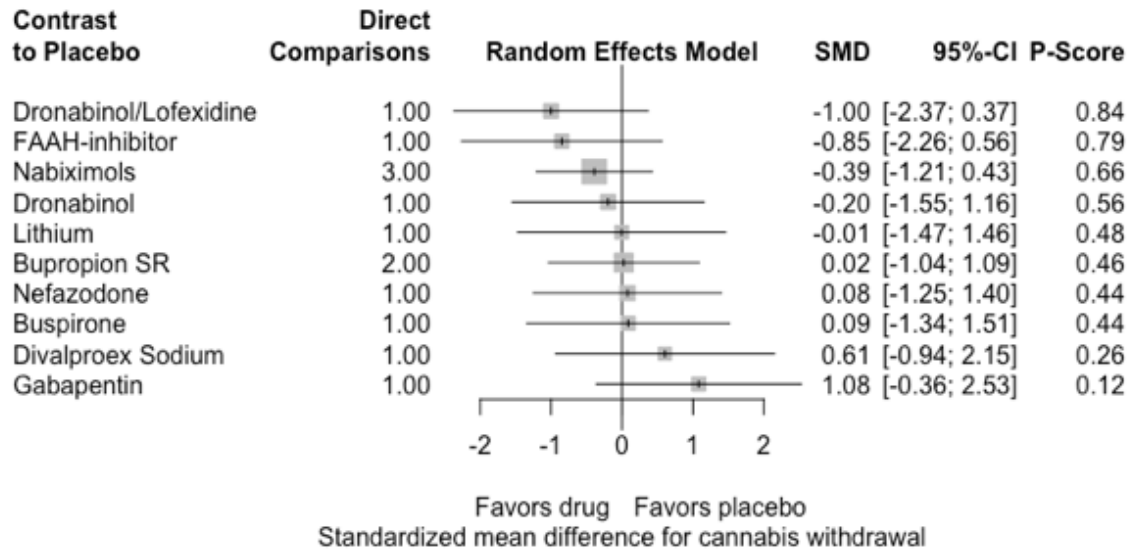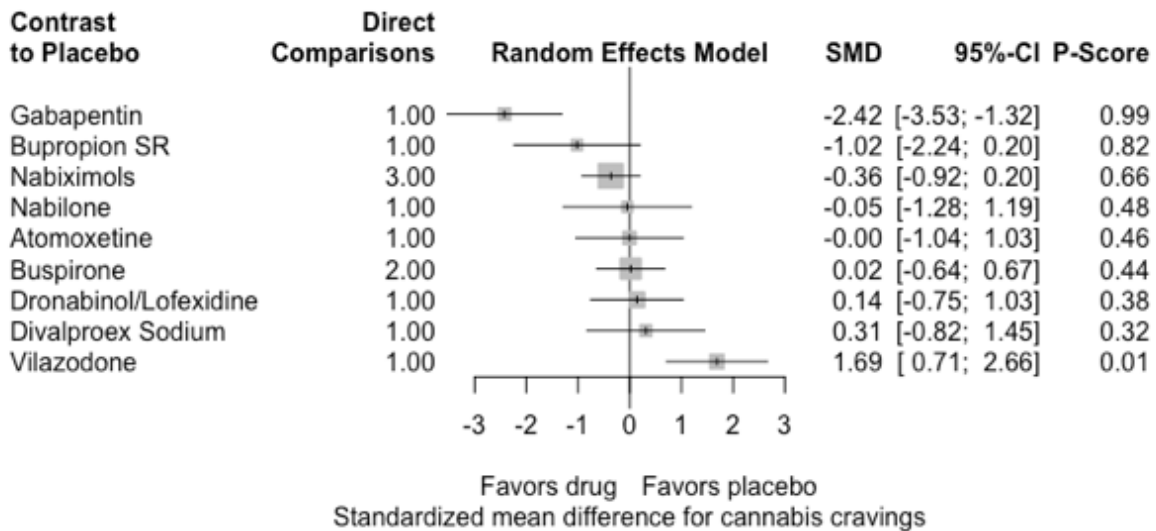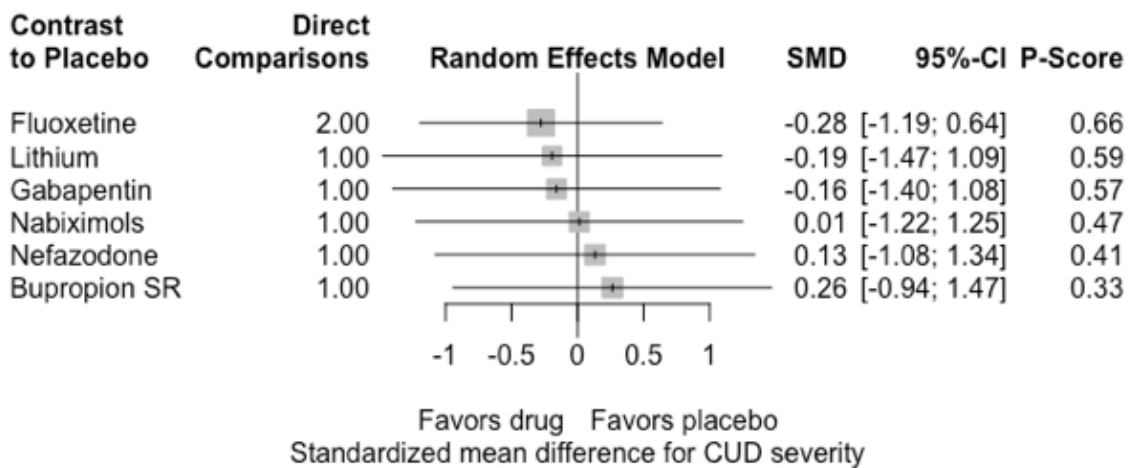

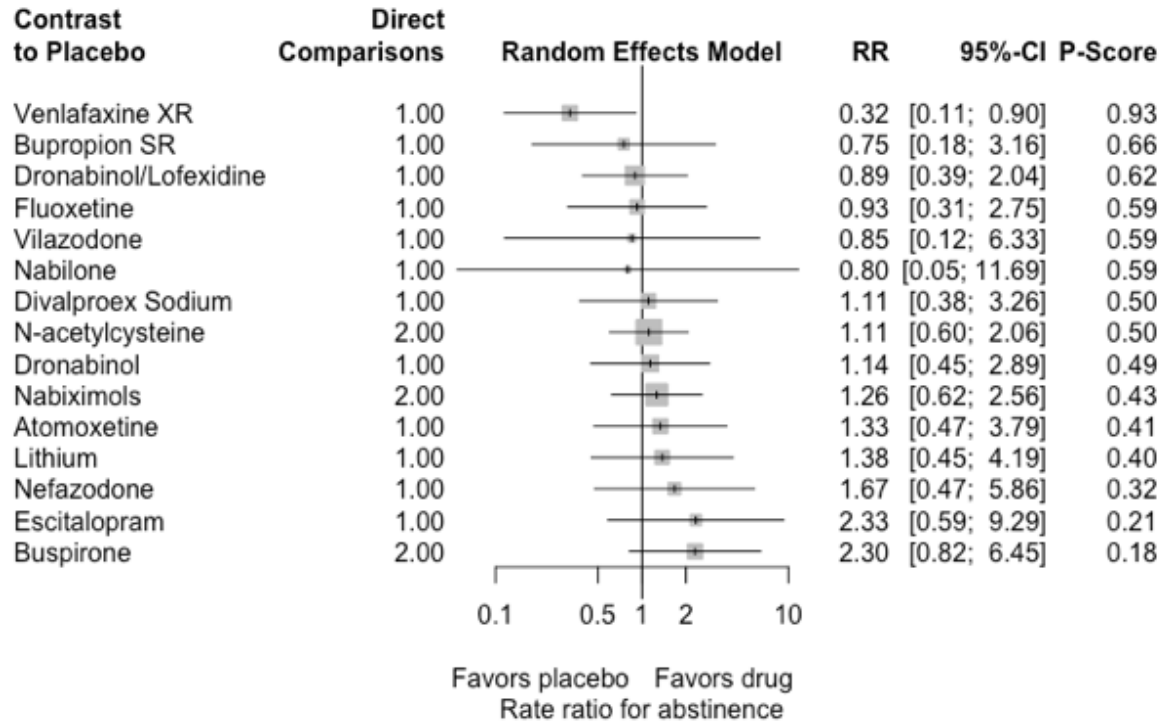

**Supplementary Table 3.** *Cochrane risk of bias tool results for individual studies. Colours indicate the risk of bias per study domain: green = low risk of bias; yellow = unclear risk of bias; and red = high risk of bias.*

|                  | Random sequence generation (selection bias) | Allocation concealment (selection bias) | Blinding of participants and personnel (performance bias) | Blinding of outcome assessment (detection bias) | Incomplete outcome data (attrition bias) | Selective reporting (reporting bias) | Other bias | Overall Risk of Bias |
|------------------|---------------------------------------------|-----------------------------------------|-----------------------------------------------------------|-------------------------------------------------|------------------------------------------|--------------------------------------|------------|----------------------|
| Alsop 2014       | +                                           | +                                       | +                                                         | +                                               | +                                        | +                                    | +          | +                    |
| Carpenter 2009   | ?                                           | +                                       | +                                                         | +                                               | +                                        | +                                    | +          | +                    |
| Cornellus 1999   | +                                           | +                                       | +                                                         | +                                               | +                                        | +                                    | +          | +                    |
| Cornellus 2010   | +                                           | +                                       | +                                                         | +                                               | +                                        | +                                    | +          | +                    |
| D'Souza 2019     | +                                           | +                                       | +                                                         | +                                               | +                                        | +                                    | +          | +                    |
| Gray 2012        | +                                           | +                                       | +                                                         | +                                               | +                                        | +                                    | +          | +                    |
| Gray 2017        | +                                           | +                                       | +                                                         | +                                               | +                                        | +                                    | +          | +                    |
| Hill 2017        | +                                           | +                                       | +                                                         | +                                               | +                                        | +                                    | +          | +                    |
| Johnston 2014    | ?                                           | ?                                       | +                                                         | +                                               | +                                        | +                                    | +          | ?                    |
| Levin 2004       | ?                                           | ?                                       | +                                                         | +                                               | +                                        | +                                    | +          | ?                    |
| Levin 2011       | +                                           | +                                       | +                                                         | +                                               | +                                        | +                                    | +          | +                    |
| Levin 2013       | +                                           | +                                       | +                                                         | +                                               | +                                        | +                                    | +          | +                    |
| Levin 2016       | +                                           | +                                       | +                                                         | +                                               | +                                        | +                                    | +          | +                    |
| Lintzeris 2019   | +                                           | +                                       | +                                                         | +                                               | +                                        | +                                    | +          | +                    |
| Mason 2012       | +                                           | +                                       | +                                                         | +                                               | +                                        | +                                    | +          | +                    |
| McRae-Clark 2009 | +                                           | +                                       | +                                                         | +                                               | +                                        | +                                    | +          | +                    |
| McRae-Clark 2010 | +                                           | +                                       | +                                                         | +                                               | +                                        | +                                    | +          | +                    |
| McRae-Clark 2015 | ?                                           | ?                                       | +                                                         | +                                               | +                                        | +                                    | +          | ?                    |
| McRae-Clark 2016 | +                                           | ?                                       | ?                                                         | ?                                               | +                                        | +                                    | +          | ?                    |
| Miranda 2017     | +                                           | +                                       | +                                                         | +                                               | +                                        | +                                    | +          | +                    |
| Penetar 2012     | ?                                           | ?                                       | +                                                         | +                                               | +                                        | +                                    | +          | ?                    |
| Sherman 2017     | ?                                           | ?                                       | +                                                         | +                                               | +                                        | +                                    | +          | ?                    |
| Trigo 2018       | +                                           | +                                       | +                                                         | +                                               | +                                        | +                                    | +          | +                    |
| Weinstein 2014   | ?                                           | ?                                       | +                                                         | +                                               | +                                        | +                                    | +          | ?                    |

| <i>Study</i>            | <b>Randomization</b> | <b>Allocation</b> | <b>Participant blinding</b> | <b>Assessment blinding</b> | <b>Attrition bias</b> | <b>Selective reporting</b> | <b>Other bias</b> | <b>The overall risk of bias</b> |
|-------------------------|----------------------|-------------------|-----------------------------|----------------------------|-----------------------|----------------------------|-------------------|---------------------------------|
| <i>Allsop 2014</i>      | Low risk             | High risk         | Low risk                    | Low risk                   | Low risk              | High risk                  | Low risk          | High risk                       |
| <i>Carpenter 2009</i>   | Unclear risk         | Low risk          | Low risk                    | Low risk                   | Low risk              | Low risk                   | Low risk          | Low risk                        |
| <i>Cornelius 1999</i>   | Low risk             | High risk         | Low risk                    | Low risk                   | Low risk              | Low risk                   | High risk         | Low risk                        |
| <i>Cornelius 2010</i>   | Low risk             | High risk         | Low risk                    | Low risk                   | Low risk              | Low risk                   | Low risk          | Low risk                        |
| <i>D'Souza 2019</i>     | Low risk             | Low risk          | Low risk                    | Low risk                   | High risk             | Low risk                   | Low risk          | Low risk                        |
| <i>Gray 2012</i>        | Low risk             | Low risk          | Low risk                    | Low risk                   | Low risk              | Low risk                   | Low risk          | Low risk                        |
| <i>Gray 2017</i>        | Low risk             | Low risk          | Low risk                    | Low risk                   | Low risk              | Low risk                   | Low risk          | Low risk                        |
| <i>Hill 2017</i>        | Low risk             | High risk         | High risk                   | High risk                  | High risk             | Low risk                   | Low risk          | High risk                       |
| <i>Johnston 2014</i>    | Unclear risk         | Unclear risk      | Low risk                    | Low risk                   | Low risk              | Low risk                   | Unclear risk      | Unclear risk                    |
| <i>Levin 2004</i>       | Unclear risk         | Unclear risk      | Low risk                    | Low risk                   | High risk             | Low risk                   | Low risk          | Unclear risk                    |
| <i>Levin 2011</i>       | Low risk             | Low risk          | Low risk                    | Low risk                   | Low risk              | Low risk                   | Low risk          | Low risk                        |
| <i>Levin 2013</i>       | Low risk             | Low risk          | Low risk                    | Low risk                   | Low risk              | Low risk                   | Low risk          | Low risk                        |
| <i>Levin 2016</i>       | Low risk             | Low risk          | Low risk                    | Low risk                   | High risk             | Low risk                   | Low risk          | Low risk                        |
| <i>Lintzeris 2019</i>   | Low risk             | Low risk          | Low risk                    | Low risk                   | High risk             | Low risk                   | Low risk          | Low risk                        |
| <i>Mason 2012</i>       | Low risk             | Low risk          | Low risk                    | Low risk                   | Unclear risk          | Low risk                   | Low risk          | Low risk                        |
| <i>McRae-Clark 2009</i> | Low risk             | Low risk          | Low risk                    | Low risk                   | Low risk              | Low risk                   | Low risk          | Low risk                        |
| <i>McRae-Clark 2010</i> | Low risk             | Low risk          | Low risk                    | Low risk                   | Low risk              | Low risk                   | Low risk          | Low risk                        |
| <i>McRae-Clark 2015</i> | Unclear risk         | Unclear risk      | Low risk                    | Low risk                   | Low risk              | Low risk                   | Low risk          | Unclear risk                    |
| <i>McRae-Clark 2016</i> | Low risk             | Unclear risk      | Unclear risk                | Unclear risk               | Low risk              | Low risk                   | High risk         | Unclear risk                    |
| <i>Miranda 2017</i>     | Low risk             | Low risk          | Low risk                    | Low risk                   | Low risk              | Low risk                   | Low risk          | Low risk                        |
| <i>Penetar 2012</i>     | Unclear risk         | Unclear risk      | Low risk                    | Low risk                   | High risk             | Unclear risk               | Low risk          | Unclear risk                    |
| <i>Sherman 2017</i>     | Unclear risk         | Unclear risk      | High risk                   | High risk                  | Low risk              | High risk                  | Low risk          | High risk                       |
| <i>Trigo 2018</i>       | Low risk             | Low risk          | Low risk                    | Low risk                   | Low risk              | Low risk                   | Low risk          | Low risk                        |
| <i>Weinstein 2014</i>   | Unclear risk         | Unclear risk      | Low risk                    | Low risk                   | High risk             | Low risk                   | Low risk          | Unclear risk                    |





Supplementary Table 4. *Funnel plots*

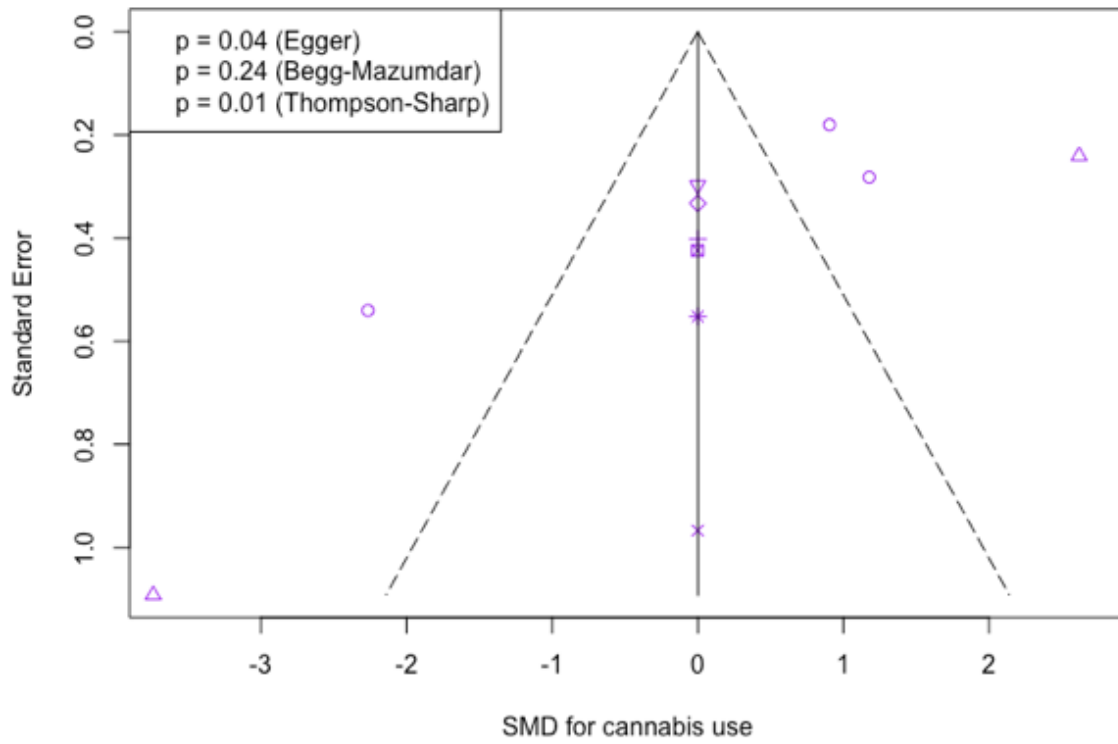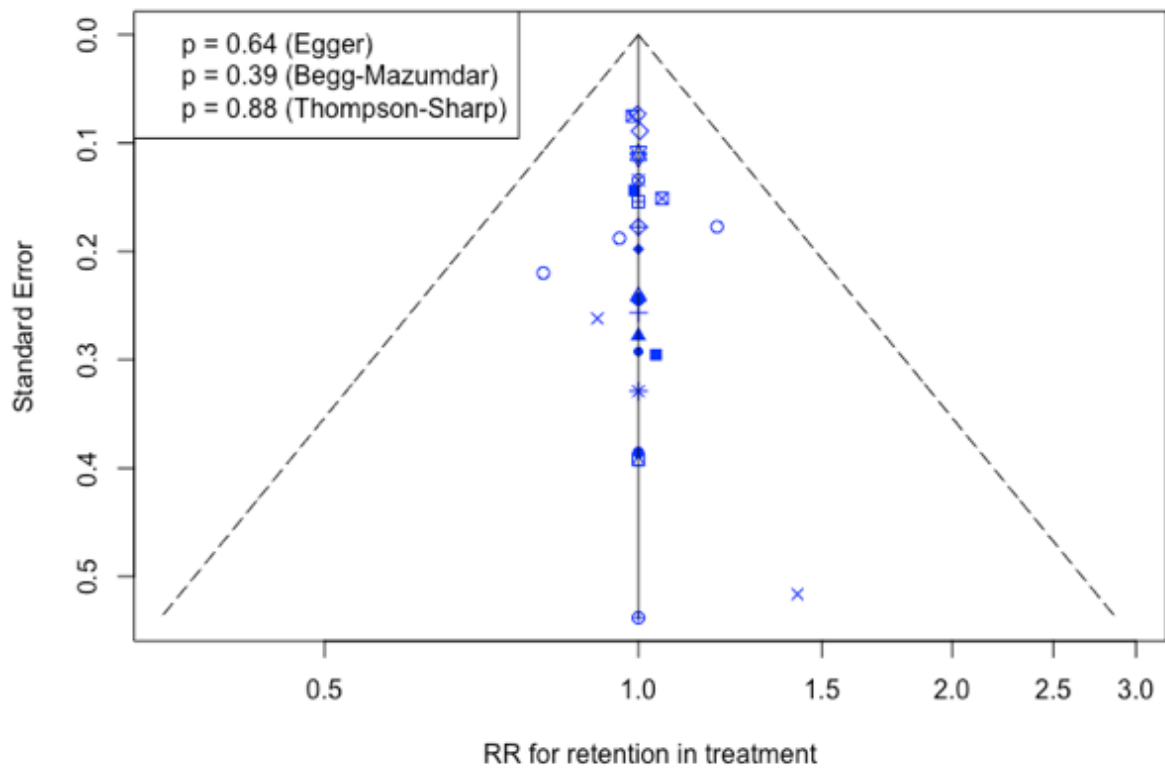

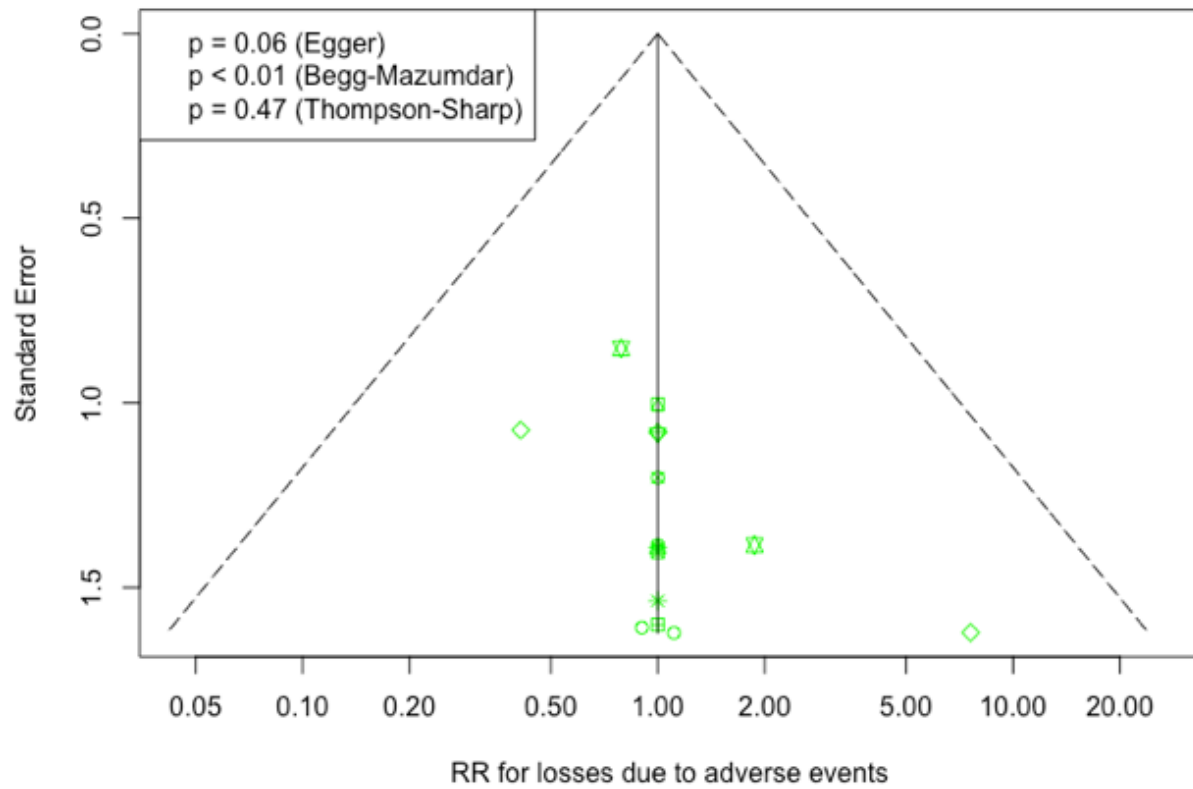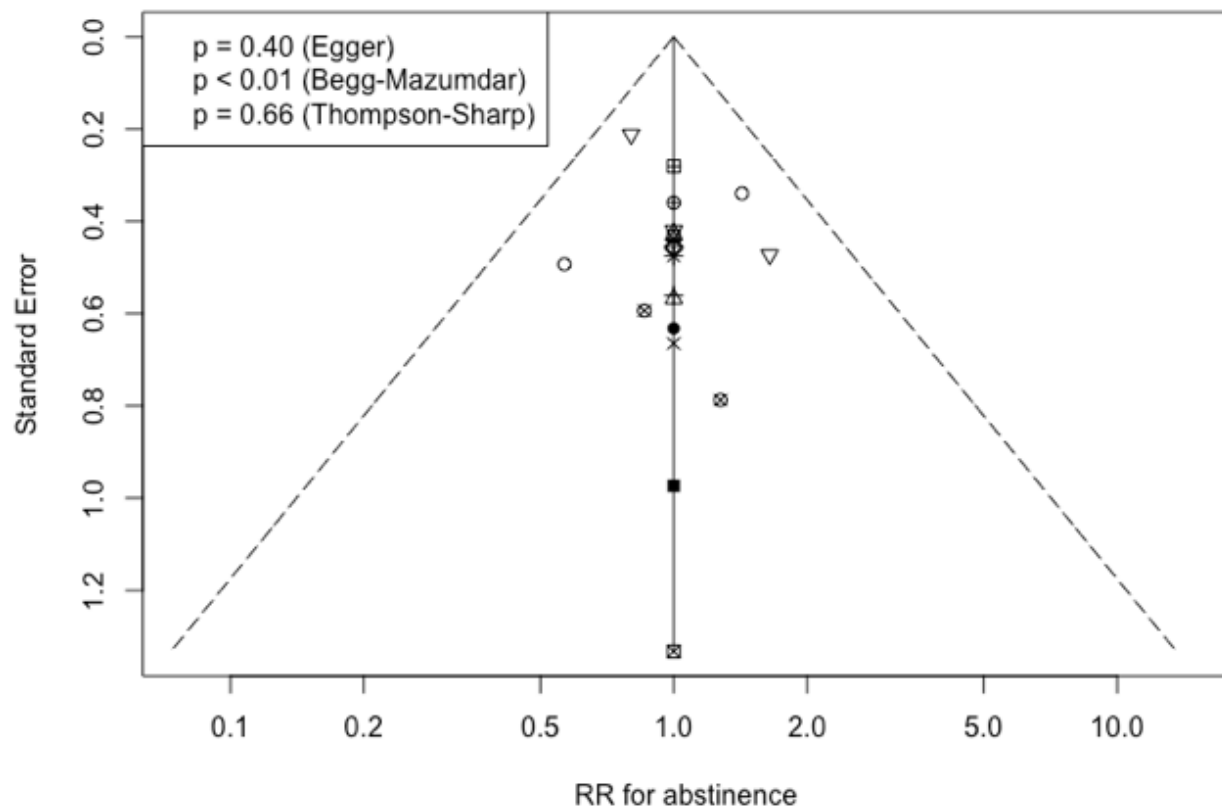

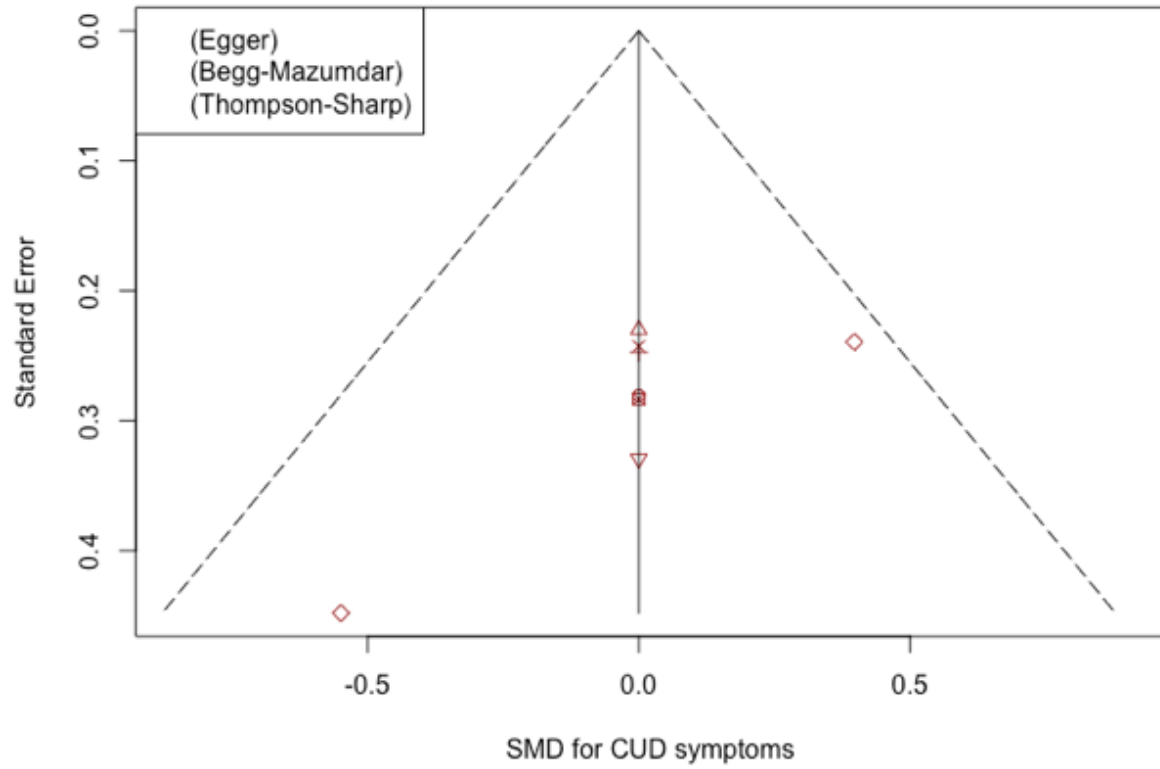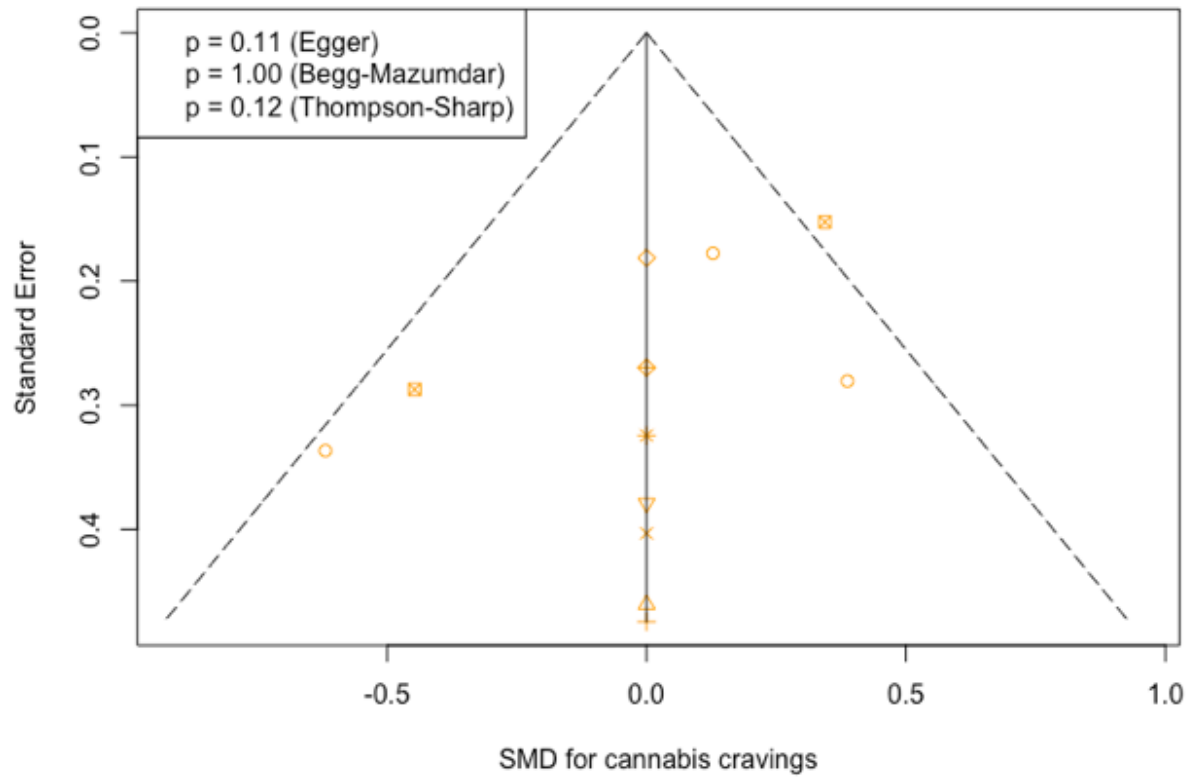

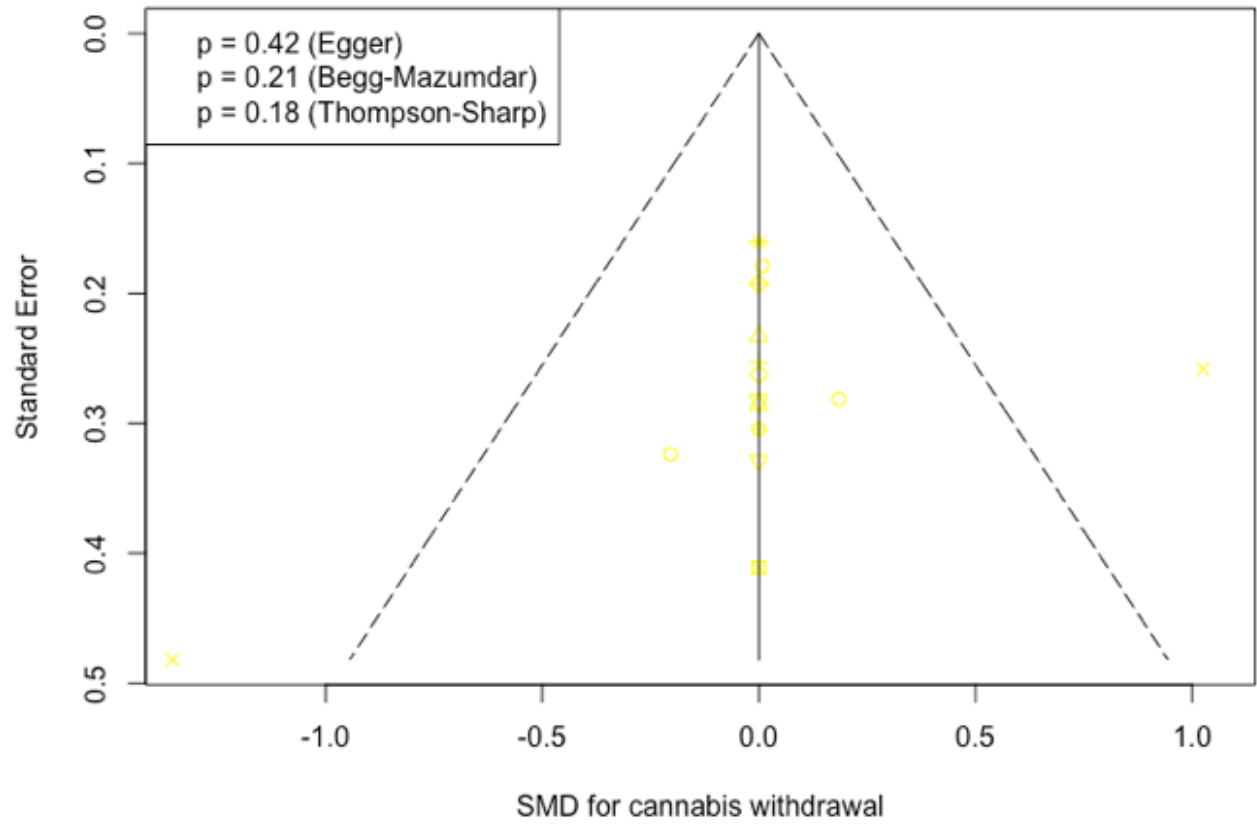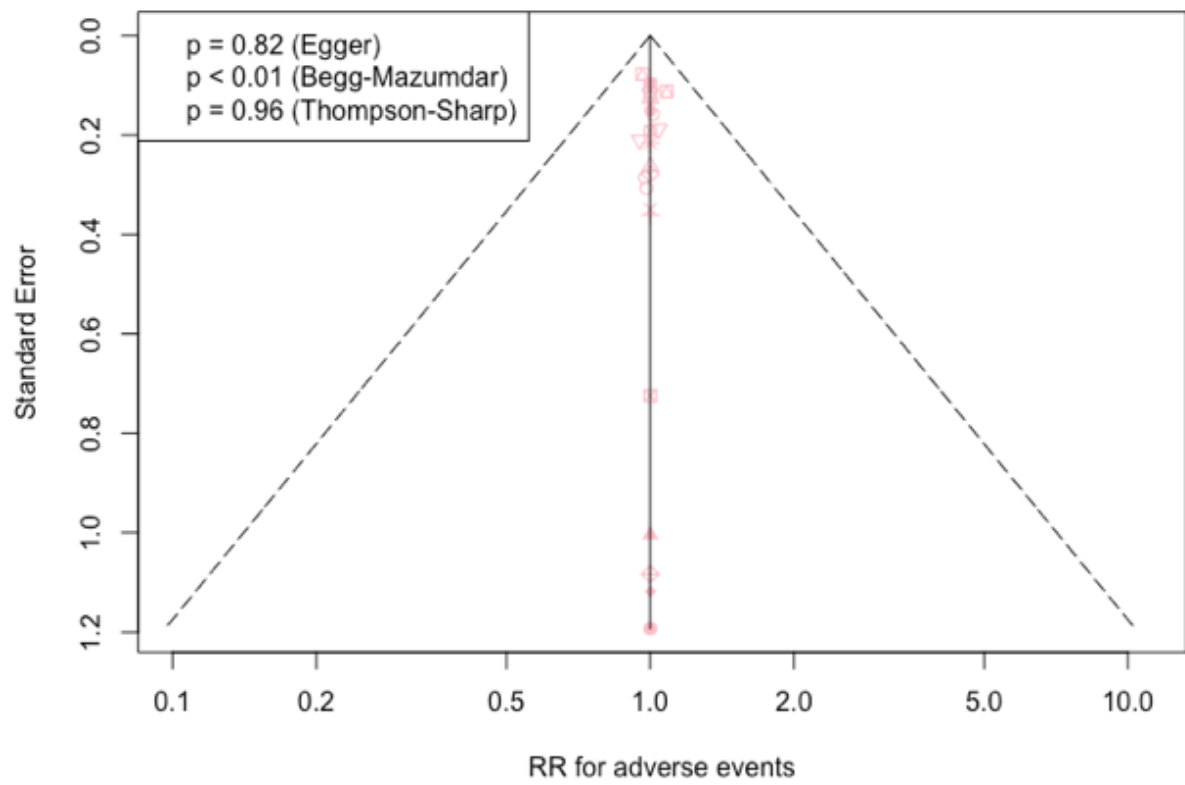

**Supplementary Table 5.** Sensitivity analysis after removing the high risk of bias studies.

|                                            |                                                                                                                                                                                                                                                                                                                                                                                                                                                                                                                                                                                                                                                                  |
|--------------------------------------------|------------------------------------------------------------------------------------------------------------------------------------------------------------------------------------------------------------------------------------------------------------------------------------------------------------------------------------------------------------------------------------------------------------------------------------------------------------------------------------------------------------------------------------------------------------------------------------------------------------------------------------------------------------------|
| Cannabis use ( <i>d</i> ) vs. placebo      | Nabiximols -1.45 [-3.32; 0.41]<br>Fluoxetine -2.30 [-4.75; 0.15]<br><b>FAAH-inhibitor</b> -3.60 [-6.86; -0.35]<br><b>Nabilone</b> -4.47 [-8.15; -0.79]<br>Lithium -0.43 [-3.65; 2.80]<br>Gabapentin -0.88 [-4.09; 2.33]<br><b>Topiramate</b> -3.80 [-7.06; -0.54]<br>Oxytocin 1.15 [-2.19; 4.48]                                                                                                                                                                                                                                                                                                                                                                 |
| Retention in treatment (RR) vs. placebo    | Nabiximols 1.15 [0.92; 1.42]<br>Nefazodone 1.13 [0.69; 1.83]<br>Bupropion SR 1.06 [0.67; 1.67]<br>Fluoxetine 1.00 [0.89; 1.11]<br>FAAH-inhibitor 0.99 [0.79; 1.24]<br>N-acetylcysteine 1.06 [0.93; 1.21]<br>Nabilone 0.80 [0.42; 1.52]<br>Lithium 1.12 [0.79; 1.58]<br>Divalproex Sodium 1.15 [0.40; 3.31]<br>Dronabinol 1.27 [1.02; 1.57]<br>Venlafaxine XR 0.96 [0.71; 1.30]<br>Dronabinol/Lofexidine 0.88 [0.68; 1.15]<br>Gabapentin 0.64 [0.30; 1.37]<br>Buspirone 0.96 [0.74; 1.23]<br>Atomoxetine 1.29 [0.60; 2.74]<br>Vilazodone 0.70 [0.41; 1.21]<br><b>Topiramate</b> 0.62 [0.42; 0.91]<br>Oxytocin 0.86 [0.53; 1.38]<br>Escitalopram 0.62 [0.35; 1.11] |
| Treatment discontinuation (RR) vs. placebo | Nabiximols 0.88 [0.66; 1.19]<br>Nefazodone 0.89 [0.57; 1.40]<br>Bupropion SR 0.95 [0.65; 1.38]<br>Fluoxetine 1.06 [0.23; 4.89]<br>FAAH-inhibitor 1.04 [0.35; 3.12]<br>N-acetylcysteine 0.87 [0.66; 1.15]<br>Nabilone 1.60 [0.39; 6.62]<br>Lithium 0.69 [0.20; 2.35]<br>Divalproex Sodium 0.92 [0.51; 1.66]<br>Dronabinol 0.58 [0.36; 0.96]<br>Venlafaxine XR 1.07 [0.65; 1.76]<br>Dronabinol/Lofexidine 1.26 [0.78; 2.05]<br>Gabapentin 1.29 [0.84; 1.97]<br>Buspirone 1.05 [0.80; 1.37]<br>Atomoxetine 0.83 [0.48; 1.44]<br>Vilazodone 1.28 [0.87; 1.89]                                                                                                        |

|                                                         |                                                                                                                                                                                                                                                                                                                                                                                                                                                                              |
|---------------------------------------------------------|------------------------------------------------------------------------------------------------------------------------------------------------------------------------------------------------------------------------------------------------------------------------------------------------------------------------------------------------------------------------------------------------------------------------------------------------------------------------------|
|                                                         | <b>Topiramate</b> 2.28 [1.06; 4.87]<br>Oxytocin 2.00 [0.22; 17.89]<br>Escitalopram 1.60 [0.90; 2.84]                                                                                                                                                                                                                                                                                                                                                                         |
| Discontinuation due to adverse events (RR) vs. placebo  | Nabiximols 0.33 [0.04; 3.09]<br>Nefazodone 0.83 [0.05; 12.77]<br>Bupropion SR 0.75 [0.05; 11.51]<br>N-acetylcysteine 0.39 [0.07; 2.28]<br>Divalproex Sodium 2.77 [0.33; 23.14]<br>Dronabinol 0.97 [0.06; 15.31]<br>Venlafaxine XR 5.10 [0.25; 103.61]<br>Dronabinol/Lofexidine 5.00 [0.60; 41.55]<br>Gabapentin 1.00 [0.07; 15.12]<br>Buspirone 0.63 [0.15; 2.60]<br>Atomoxetine 3.00 [0.13; 69.20]<br>Vilazodone 1.71 [0.16; 18.04]<br><b>Topiramate</b> 9.10 [1.27; 65.11] |
| Cannabis withdrawal ( <i>d</i> ) vs. placebo            | Nabiximols -0.39 [-1.21; 0.43]<br>Nefazodone 0.08 [-1.25; 1.40]<br>Bupropion SR 0.02 [-1.04; 1.09]<br>FAAH-inhibitor -0.85 [-2.26; 0.56]<br>Lithium -0.01 [-1.47; 1.46]<br>Divalproex Sodium 0.61 [-0.94; 2.15]<br>Dronabinol -0.20 [-1.55; 1.16]<br>Dronabinol/Lofexidine -1.00 [-2.37; 0.37]<br>Gabapentin 1.08 [-0.36; 2.53]<br>Buspirone 0.09 [-1.34; 1.51]                                                                                                              |
| Cannabis cravings ( <i>d</i> ) vs. placebo              | Nabiximols -0.36 [-0.92; 0.20]<br>Bupropion SR -1.02 [-2.24; 0.20]<br>Nabilone -0.05 [-1.28; 1.19]<br>Divalproex Sodium 0.31 [-0.82; 1.45]<br>Dronabinol/Lofexidine 0.14 [-0.75; 1.03]<br><b>Gabapentin</b> -2.42 [-3.53; -1.32]<br>Buspirone 0.02 [-0.64; 0.67]<br>Atomoxetine -0.00 [-1.04; 1.03]<br>Vilazodone 1.69 [0.71; 2.66]                                                                                                                                          |
| Cannabis use disorder symptoms ( <i>d</i> ) vs. placebo | Nabiximols 0.01 [-1.22; 1.25]<br>Nefazodone 0.13 [-1.08; 1.34]<br>Bupropion SR 0.26 [-0.94; 1.47]<br>Fluoxetine -0.28 [-1.19; 0.64]<br>Lithium -0.19 [-1.47; 1.09]<br>Gabapentin -0.16 [-1.40; 1.08]                                                                                                                                                                                                                                                                         |
| Adverse events (RR) vs. placebo                         | Nabiximols 0.99 [0.77; 1.26]<br>Nefazodone 1.56 [0.77; 3.17]<br>Bupropion SR 1.69 [0.85; 3.35]<br>FAAH-inhibitor 0.95 [0.55; 1.64]<br>N-acetylcysteine 0.94 [0.71; 1.23]                                                                                                                                                                                                                                                                                                     |

|                             |                                                                                                                                                                                                                                                                                                                                                                                                                                                                                                                          |
|-----------------------------|--------------------------------------------------------------------------------------------------------------------------------------------------------------------------------------------------------------------------------------------------------------------------------------------------------------------------------------------------------------------------------------------------------------------------------------------------------------------------------------------------------------------------|
|                             | Nabilone 0.40 [0.10; 1.66]<br>Lithium 1.18 [0.77; 1.80]<br>Divalproex Sodium 2.77 [0.33; 23.14]<br>Dronabinol 1.15 [0.90; 1.46]<br>Venlafaxine XR 1.78 [1.40; 2.26]<br>Dronabinol/Lofexidine 1.02 [0.84; 1.25]<br>Gabapentin 0.75 [0.52; 1.09]<br>Buspirone 1.14 [1.00; 1.29]<br>Atomoxetine 1.18 [0.98; 1.43]<br>Vilazodone 0.76 [0.57; 1.02]<br>Topiramate 9.10 [1.27; 65.11]<br>Oxytocin 0.50 [0.06; 4.47]<br>Escitalopram 2.00 [0.19; 20.72]                                                                         |
| Abstinence (RR) vs. placebo | Nabiximols 1.26 [0.62; 2.56]<br>Nefazodone 1.67 [0.47; 5.86]<br>Bupropion SR 0.75 [0.18; 3.16]<br>Fluoxetine 0.93 [0.31; 2.75]<br>N-acetylcysteine 1.11 [0.60; 2.06]<br>Nabilone 0.80 [0.05; 11.69]<br>Lithium 1.37 [0.45; 4.19]<br>Divalproex Sodium 1.11 [0.38; 3.26]<br>Dronabinol 1.14 [0.45; 2.89]<br>Venlafaxine XR 0.32 [0.11; 0.90]<br>Dronabinol/Lofexidine 0.89 [0.39; 2.04]<br>Buspirone 2.30 [0.82; 6.45]<br>Atomoxetine 1.33 [0.47; 3.79]<br>Vilazodone 0.85 [0.12; 6.33]<br>Escitalopram 2.33 [0.59; 9.29] |

**Supplementary Table 6.** Medications included in this analysis and their current medical use

| Agent                        | Mechanism of action                                                                                              | Clinical use                                                                       |
|------------------------------|------------------------------------------------------------------------------------------------------------------|------------------------------------------------------------------------------------|
| Nabiximols                   | A mixture of tetrahydrocannabinol (THC) and cannabidiol (CBD)                                                    | Spasticity in multiple sclerosis                                                   |
| Nefazodone                   | Serotonin antagonist and reuptake inhibitor (SARI)                                                               | Antidepressant                                                                     |
| Bupropion sustained-release  | Noradrenergic and dopaminergic reuptake inhibitor (NDRI)                                                         | Antidepressant, smoking cessation, attention-deficit hyperactivity disorder (ADHD) |
| Fluoxetine                   | Selective serotonin reuptake inhibitor (SSRI)                                                                    | Antidepressant, anxiolytic                                                         |
| N-acetylcysteine             | Glutathione precursor, role in glutamatergic neurotransmission                                                   | Acetaminophen overdose, treatment of several psychiatric disorders                 |
| Nabilone                     | Synthetic cannabinoid                                                                                            | Antiemetic, analgesic, nightmares in post-traumatic stress disorder                |
| Lithium                      | Unclear, but appears to modulate secondary messenger systems                                                     | Mood stabilizer in bipolar disorder, augmentation agent in depression              |
| Divalproex                   | An antagonist of the voltage-gated sodium channel that enhances gamma-aminobutyric acid (GABA) neurotransmission | Anticonvulsant, mood-stabilizing agent, anti-migraine agent                        |
| Dronabinol                   | Synthetic cannabinoid                                                                                            | Antiemetic, analgesic, appetite stimulant                                          |
| Venlafaxine extended-release | Serotonin-norepinephrine reuptake inhibitor (SNRI)                                                               | Antidepressant, anxiolytic, analgesic for neuropathic pain                         |
| Lofexidine                   | $\alpha_{2A}$ adrenergic receptor agonist                                                                        | Opioid withdrawal, hypertension                                                    |
| Buspirone                    | Non-benzodiazepine anxiolytic                                                                                    | Anxiety disorders                                                                  |
| Atomoxetine                  | Noradrenergic reuptake inhibitor (NRI)                                                                           | ADHD                                                                               |
| Vilazodone                   | Serotonin reuptake inhibitor and 5-HT <sub>1A</sub> receptor partial agonist                                     | Antidepressant                                                                     |
| Escitalopram                 | Selective serotonin reuptake inhibitor (SSRI)                                                                    | Antidepressant, anxiolytic                                                         |
